# Supplementary material for: Multiple phenyl ring appended Re-based complexes for strong visible light absorption and DNA binding
Source: Royal Society of Chemistry journal article supplement (doi:10.1039/d1dt02216d), 2021-01-01
Supplement: d1dt02216d1.pdf [file d1dt02216d1.pdf]

## Supporting Information

### Multiple Phenyl Rings appended Re-based Complexes for Strong Visible Light Absorption and DNA Binding

Bholey Singh,<sup>a</sup> Balaram Pani,<sup>a</sup> Deepak Gupta<sup>a,b\*</sup>

<sup>a</sup> Department of Chemistry, Bhaskaracharya College of Applied Sciences (University of Delhi), Sector-2, Dwarka, New Delhi, 110075, India

<sup>b</sup> Present Address: Institut de La Matie're Condense et des Nanosciences (IMCN), Universite' Catholique de Louvain (UCL), Place Louis Pasteur 1, 1348, Louvain-la-Neuve, Belgium

#### Table of Content:

1. Figure S1: Solid-state FTIR spectra of **1–3**.
2. Figure S2: <sup>1</sup>H-NMR spectra of **1–3** in DMSO-*d*<sub>6</sub> (300MHz). \*indicates signals belonging to reaction solvent (toluene).
3. Figure S3: <sup>31</sup>P-<sup>1</sup>H NMR spectra of **1–3** in DMSO-*d*<sub>6</sub> (300MHz).
4. Table: S1 Crystallographic data for crystal structures of **1** and **2**.
5. Figure S4: The bunch of aromatic units around Re-(NO)-Re core in **1**(top) and **2**(bottom).
6. Figure S5: ESI-MS spectra of **1** in acetonitrile.
7. Figure S6: ESI-MS spectra of **2** in acetonitrile.
8. Figure S7: ESI-MS spectra of **3** in acetonitrile.
9. Figure S8: Fluorescence emission spectra of acyclic complexes 1-3 in acetonitrile in absence and presence of different concentrations of (0.2184- 1.5288μM) of ct-DNA in PBS at pH 7.0 at 25°C. The excitation wavelength ( $\lambda_{ex}$ ) was 490 nm.
10. Figure S9: Circular dichroism (CD) spectra of ct-DNA (100 mM) in absence and presence of different concentrations [Q] (0.1654–1.1518 μM) of acyclic complexes **1–3** in PBS (pH 7.0) at 25°C.
11. Figure S10: Absorption spectra of complexes **1–3** in DCM.
12. Figure S11: Emission spectra of complexes (1-3) in dry and degassed ACN with successive addition of PBS buffer solution.

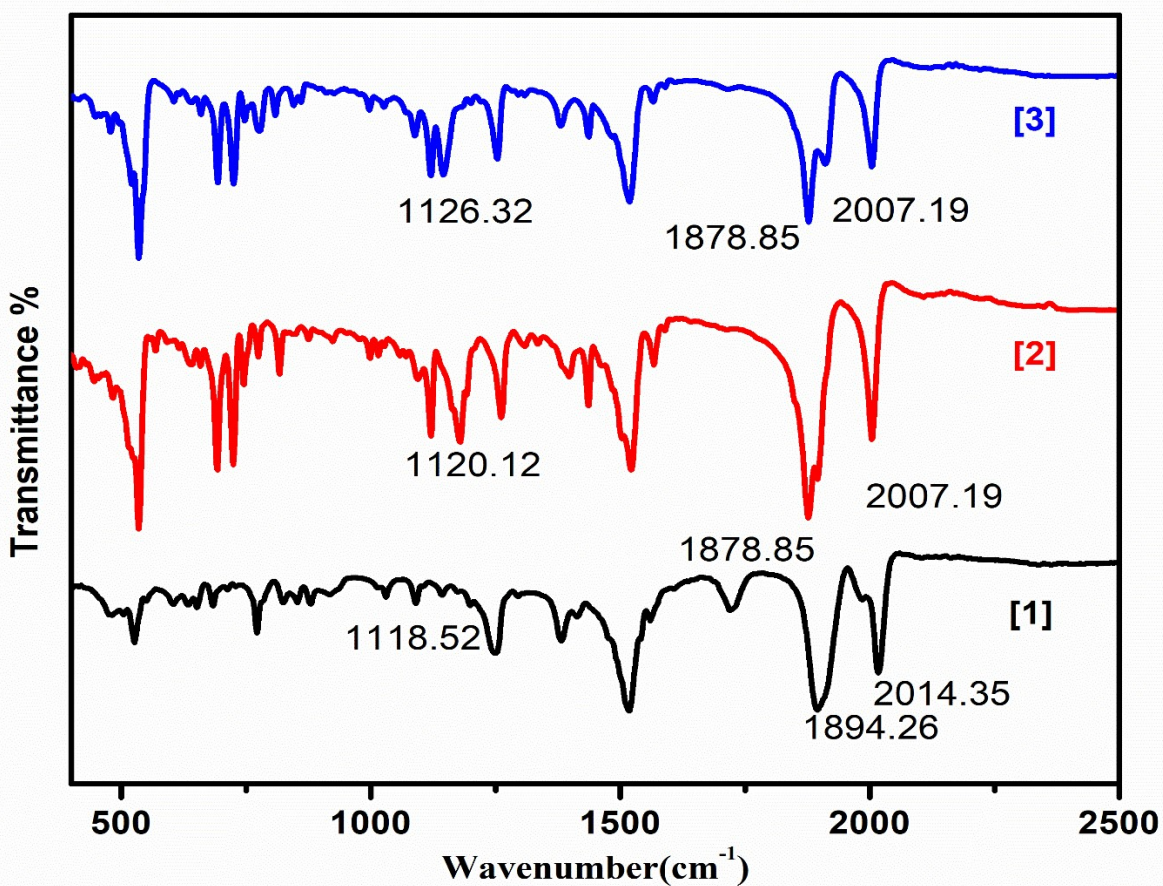

Figure S1: Solid-state FTIR spectra of 1–3.

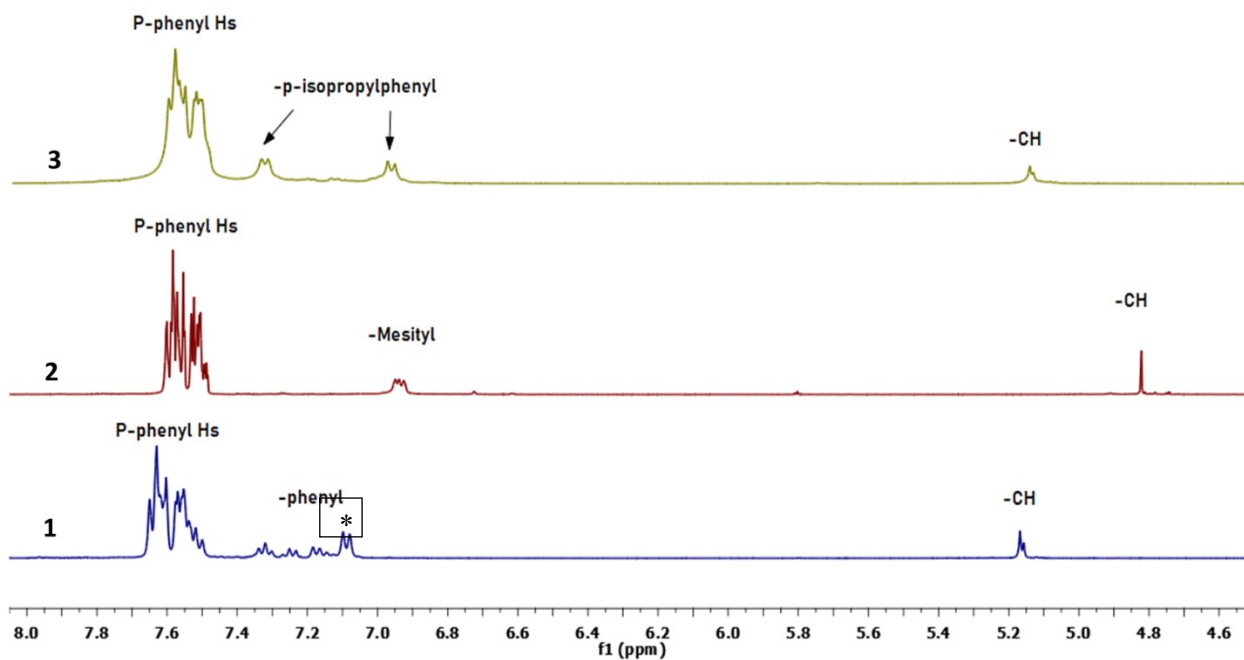

Figure S2:  $^1\text{H}$ -NMR spectra of 1–3 in  $\text{DMSO-}d_6$  (300MHz). \*indicates signals belonging to reaction solvent (toluene).

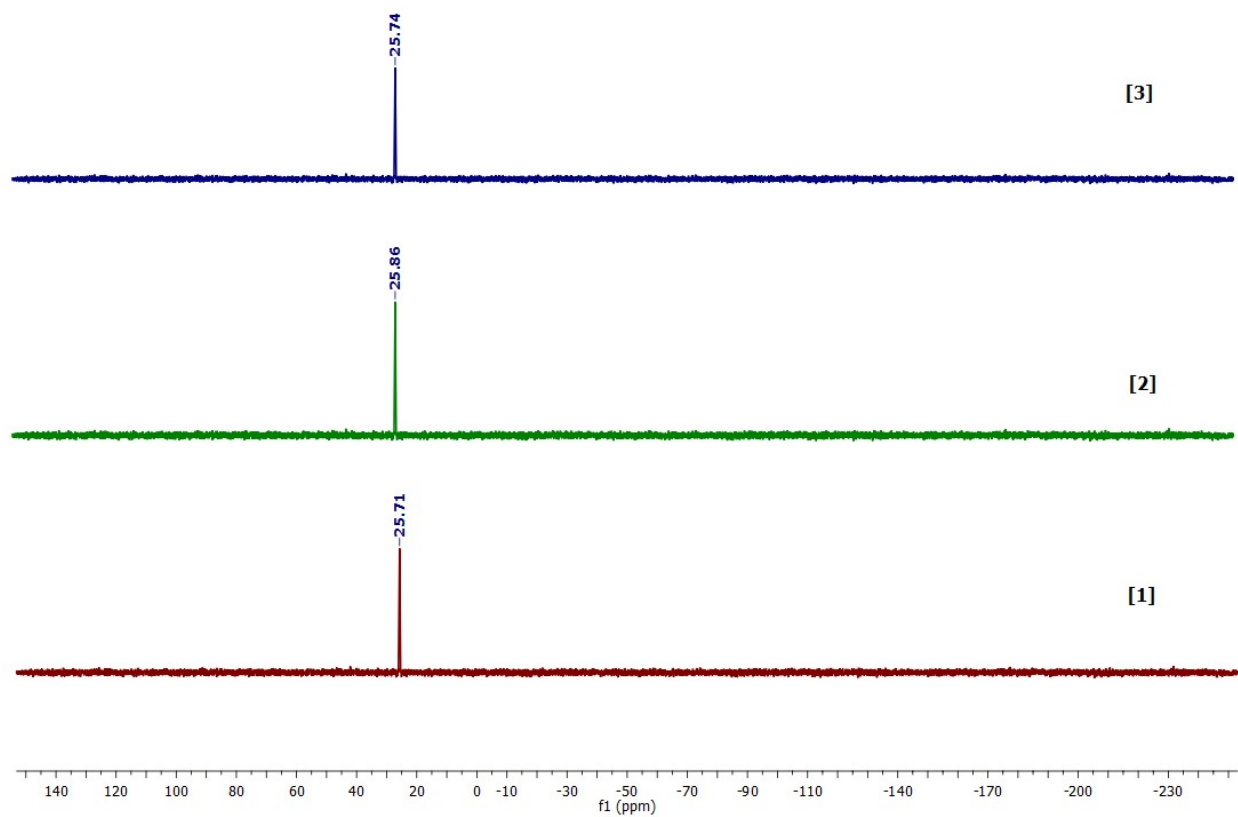

Figure S3:  $^{31}\text{P}\{-^1\text{H}\}$  NMR spectra of **1–3** in  $\text{DMSO-}d_6$  (300MHz).

Table: S1 Crystallographic data for crystal structures of **1** and **2**.

| <b>Empirical formula</b>           | <b>C<sub>60</sub> H<sub>48</sub> N<sub>2</sub> O<sub>10</sub> P<sub>2</sub> Re<sub>2</sub></b> | <b>C<sub>66</sub> H<sub>60</sub> N<sub>2</sub> O<sub>10</sub> P<sub>2</sub> Re<sub>2</sub></b> |
|------------------------------------|------------------------------------------------------------------------------------------------|------------------------------------------------------------------------------------------------|
| Crystal system                     | Monoclinic                                                                                     | Triclinic                                                                                      |
| Space Group                        | <i>P 21/n (14)</i> `                                                                           | <i>P -1 (2)</i> `                                                                              |
| a [Å]                              | 13.6091(4)                                                                                     | 10.1180(6)                                                                                     |
| b [Å]                              | 15.1518(5)                                                                                     | 10.6093(6)                                                                                     |
| c [Å]                              | 15.1092(7)                                                                                     | 15.8454(7)                                                                                     |
| V[Å <sup>3</sup> ]                 | 3103.6(2)                                                                                      | 1522.66(15)                                                                                    |
| Z                                  | 2                                                                                              | 2                                                                                              |
| Molecular weight                   | 1385.29                                                                                        | 734.72                                                                                         |
| ρ calc [g/cm <sup>3</sup> ]        | 1.482                                                                                          | 1.603                                                                                          |
| Temperature [K]                    | 293(2)                                                                                         | 293(2)                                                                                         |
| Wavelength [MoK <sub>α</sub> ] [Å] | 0.71073                                                                                        | 0.71073                                                                                        |
| Monochromator                      | Graphite                                                                                       | Graphite                                                                                       |
| Min/Max Bragg angle [°]            | 3.023-29.783                                                                                   | 3.6030-27.5740                                                                                 |
| hkl range                          | -17 to 16, -18 to 18, -18 to 18                                                                | -12 to 12, -12 to 12, -19 to 19                                                                |
| F(000)                             | 1352                                                                                           | 724                                                                                            |
| μ (mm <sup>-1</sup> )              | 4.002                                                                                          | 4.083                                                                                          |
| R <sub>int</sub>                   | 0.1145                                                                                         | 0.0383                                                                                         |
| R <sub>sigma</sub>                 | 0.0725                                                                                         | 0.0310                                                                                         |
| Refinement                         | F2                                                                                             | F2                                                                                             |
| No. of reflections used            | 23257                                                                                          | 16621                                                                                          |
| Number of parameters               | 346                                                                                            | 374                                                                                            |
| GoF                                | 1.058                                                                                          | 1.002                                                                                          |
| wR <sub>2</sub>                    | 0.2208                                                                                         | 0.0637                                                                                         |
| Δρ/e [Å <sup>-3</sup> ]            | 2.355/-0.591                                                                                   | 0.977/-0.617                                                                                   |
| Number of parameters               | 346                                                                                            | 374                                                                                            |
| GoF                                | 1.058                                                                                          | 1.002                                                                                          |

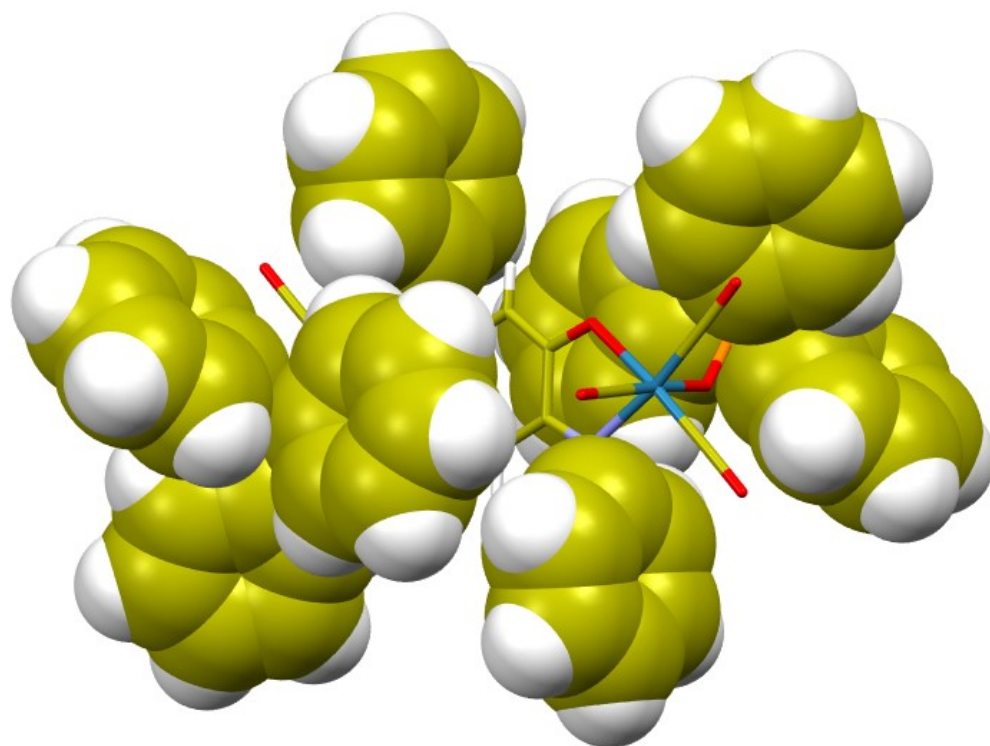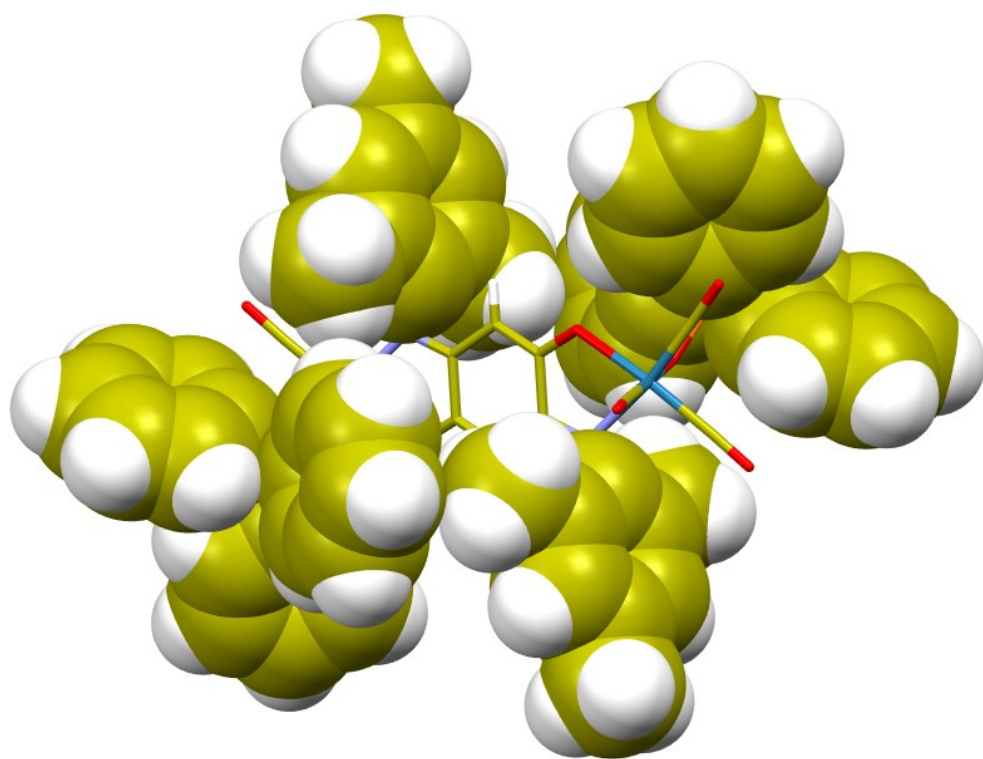

Figure S4: The bunch of aromatic units around Re-(NO)-Re core in **1**(top) and **2**(bottom).

|               |          |             |           |                 |              |                        |                     |
|---------------|----------|-------------|-----------|-----------------|--------------|------------------------|---------------------|
| Sample Name   | PG-299   | Position    | P1-C8     | Instrument Name | Instrument 1 | User Name              |                     |
| Inj Vol       | 5        | InjPosition |           | SampleType      | Sample       | IRM Calibration Status | Success             |
| Data Filename | PG-299.d | ACQ Method  | Damo JK.m | Comment         |              | Acquired Time          | 20-11-2018 15:44:21 |

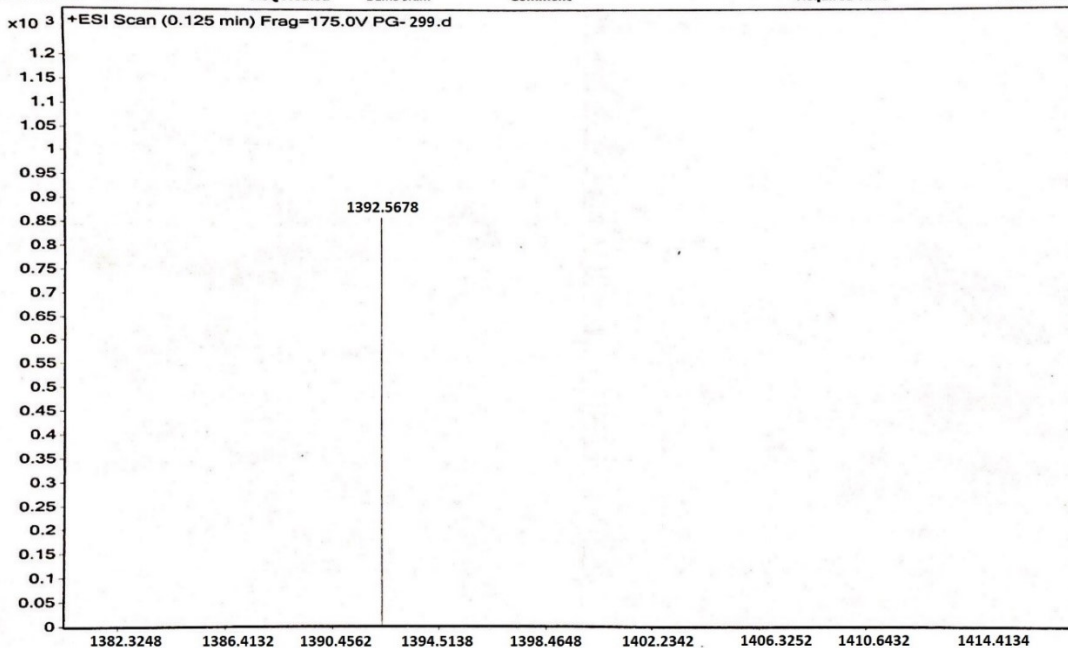

Figure S5: ESI-MS spectra of **1** in acetonitrile.

|               |          |             |           |                 |              |                        |                     |
|---------------|----------|-------------|-----------|-----------------|--------------|------------------------|---------------------|
| Sample Name   | PG-119   | Position    | P1-C6     | Instrument Name | Instrument 1 | User Name              |                     |
| Inj Vol       | 1        | InjPosition |           | SampleType      | Sample       | IRM Calibration Status | Success             |
| Data Filename | PG-123.d | ACQ Method  | Damo JK.m | Comment         |              | Acquired Time          | 22-11-2018 16:01:32 |

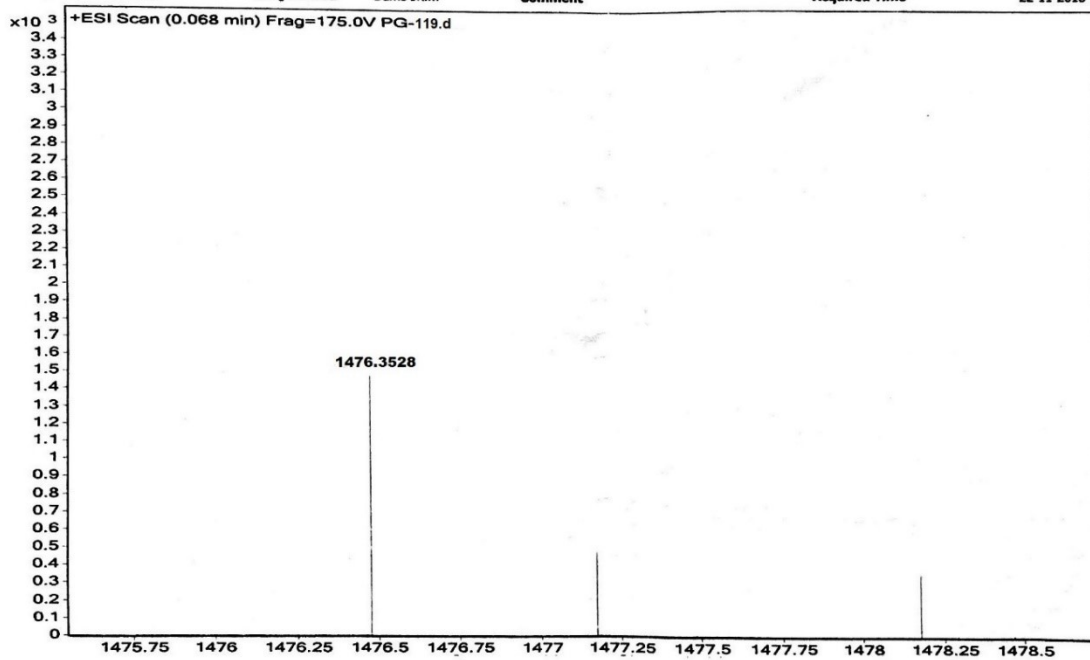

Figure S6: ESI-MS spectra of **2** in acetonitrile.



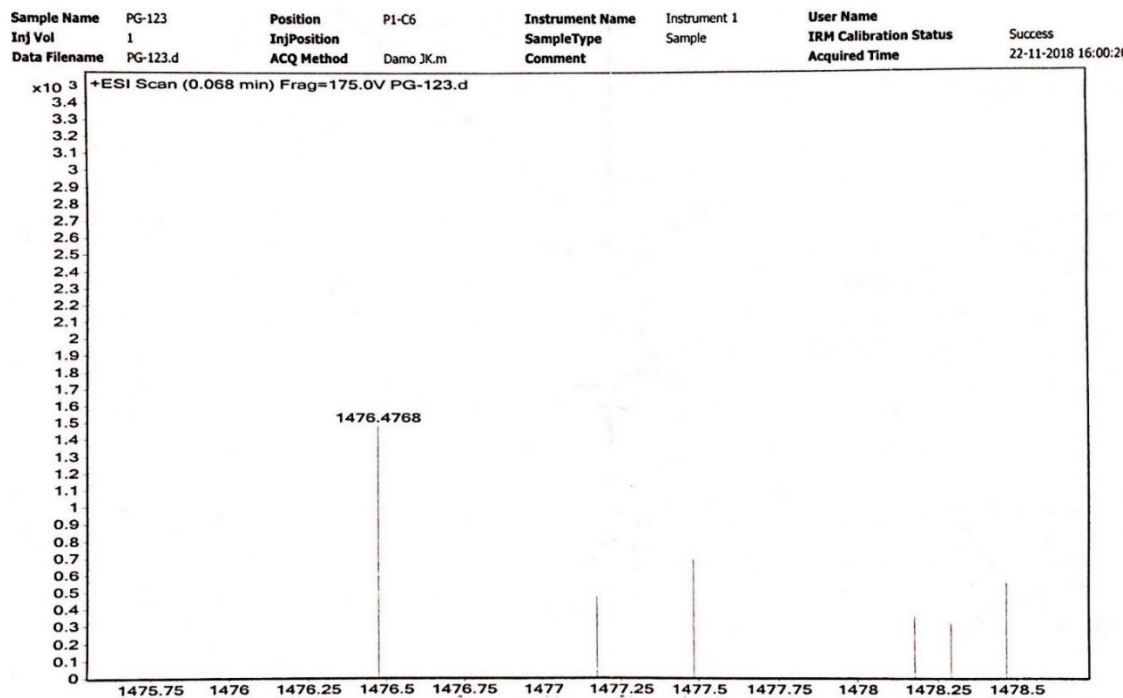

Figure S7: ESI-MS spectra of **3** in acetonitrile.

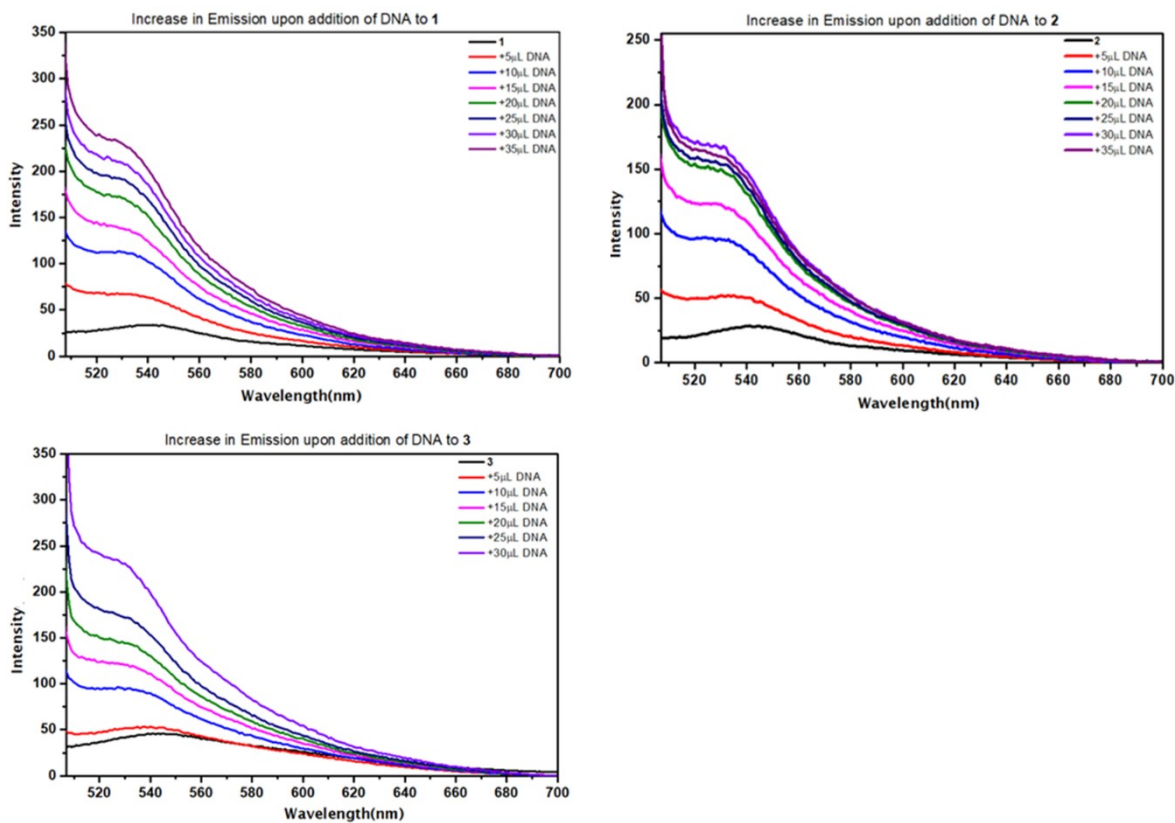

Figure S8: Fluorescence emission spectra of acyclic complexes 1-3 in acetonitrile in absence and presence of different concentrations of (0.2184- 1.5288 $\mu$ M) of ct-DNA in PBS at pH 7.0 at 25 $^{\circ}$ C. The excitation wavelength ( $\lambda_{ex}$ ) was 490 nm.

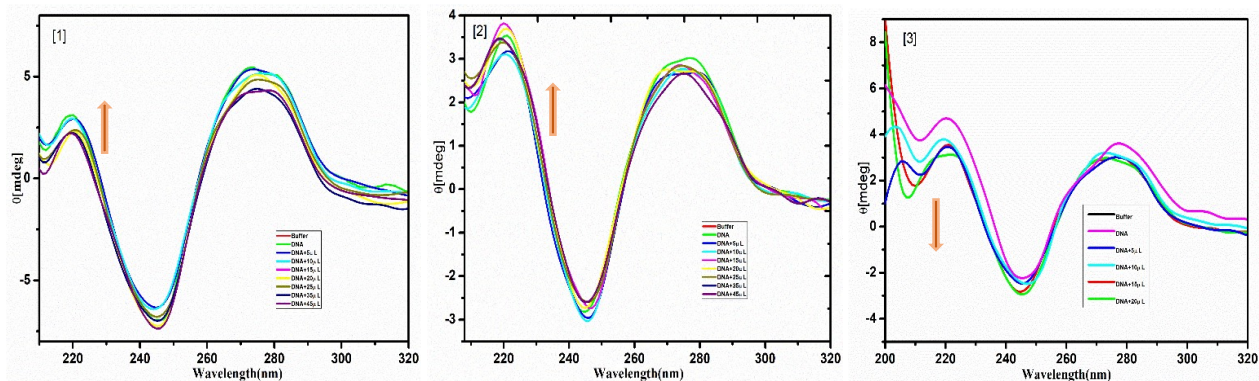

Figure S9: Circular dichroism (CD) spectra of ct-DNA (100 mM) in absence and presence of different concentrations [Q] (0.1654–1.1518  $\mu\text{M}$ ) of acyclic complexes 1–3 in PBS (pH 7.0) at 25°C.

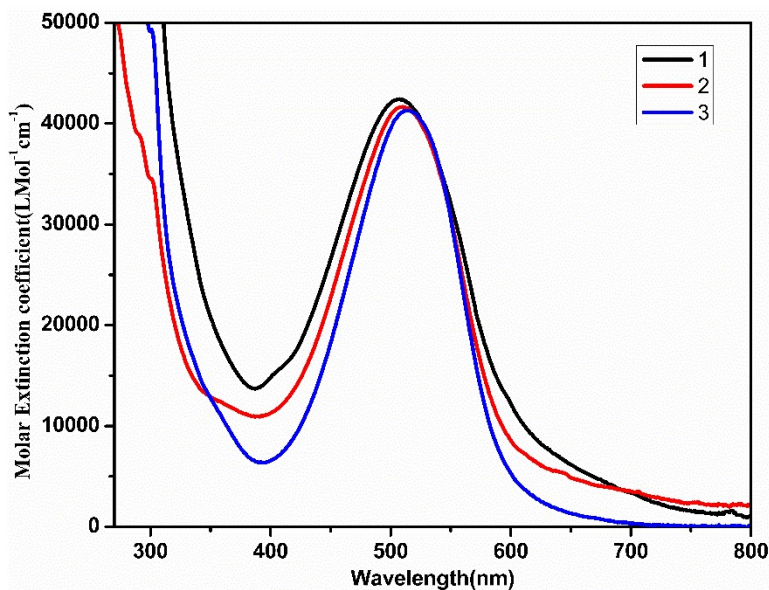

Figure S10: Absorption spectra of complexes 1–3 in DCM.

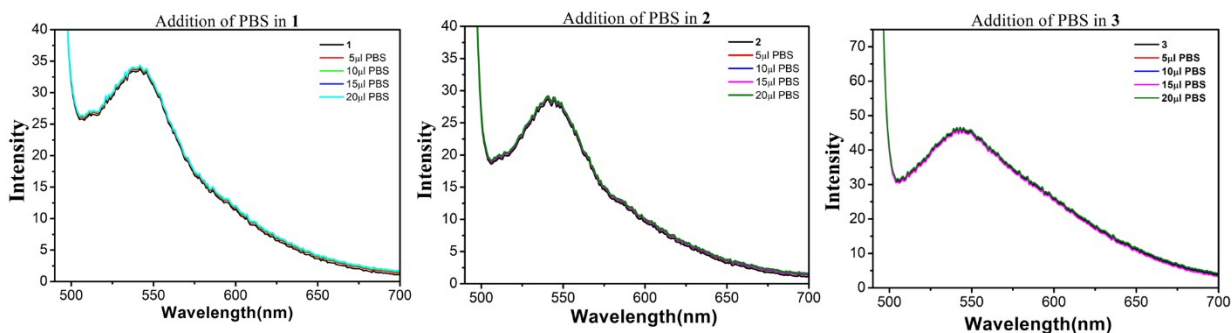

Figure S11: Emission spectra of complexes (1-3) in dry and degassed ACN with successive addition of PBS buffer solution.
